# Supplementary material
Source: Research Square preprint supplement (doi:10.21203/rs.3.rs-9451621/v1)
Supplement: Supplementary file 1 [file fb339364e2a01eca2dcfa7a7.docx]

**Table S1.** Details of fungal phytopathogens used in this study

| Host plant | Scientific name | Isolate | Provider |
| --- | --- | --- | --- |
| Tomato | *Fusarium oxysporum* f. sp. *lycopersici* | Foly4 | World vegetable center |
| Tomato | *F. oxysporum* f. sp. *lycopersici* | F-01 | Taiwan seed improvement and propagation station (TSIPS) |
| Watermelon | *F. oxysporum* f. sp. *niveum* | Fon-H0103 | Dr. Jenn-Wen Huang |
| Strawberry | *Colletotrichum gloeosporioides* | CG8 | Dr. Wen-Hsin Chung |
| Rice | *Magnaporthe oryzae* | PT-3 | Dr. Chih-Li Wang |

**Table S2**. Molecular identity of 18 rhizobacterial strains based on sequence analysis of 16S rDNA region

| Strain I | Closest identity II | Identity (%) |
| --- | --- | --- |
| LCKV | *Klebsiella variicola* F2R9 | 99.93 |
| LCAP | *Acinetobacter pittii* DSM | 99.86 |
| LCPN-23 | *Pseudomonas nitroreducens* IAM | 99.35 |
| LCPA | *P. aeruginosa* DSM | 100.00 |
| NRAP-1 | *A. pittii* strain LMG | 99.93 |
| NRAP-2 | *A. pittii* strain LMG | 99.93 |
| NRBC | *Burkholderia contaminans* J2956 | 99.93 |
| NRBA | *B. aenigmatica* LMG | 99.71 |
| NRKV | *K. variicola* F2R9 | 99.85 |
| NRRS | *Ralstonia syzygii* subsp. *indonesiensis* UQRS | 99.06 |
| NRAP-3 | *A. pittii* DSM | 99.86 |
| WRPT | *P. taiwanensis* DSM 21245 | 100.00 |
| WRSS | *Serratia surfactantfaciens* YD25 | 99.86 |
| WRPN-1 | *P. nitritireducens* WZBFD3-5A2 | 99.49 |
| WRAB | *A. baumannii* ATCC | 100.00 |
| WRPM | *P. mosselii* CFML | 99.93 |
| WSPN-21 | *P. nitroreducens* IAM | 99.35 |
| WSPN-22 | *P. nitroreducens* IAM | 99.35 |

I The first two alphabets, LC, NR, WR, and WS, of strain represent the source as Linluo cucumber, NPUST rice, Wandan rice, and Wandan sugarcane fields, respectively. The last two alphabets of strain are the initials of their scientific names.

II The closest identity was obtained by aligning the sequence of self-isolated strains to the NCBI BLAST database.

**Table S3.** List of primers used for qRT-PCR

| Gene | Forward Primer (5’ to 3’) | Reverse Primer (3’ to 5’) |
| --- | --- | --- |
| *β*-tubulin (*TUB*) | CAAGAACTCGTCCTACTTTG | GCTCACTCACCCTTCTAA |
| *WRKY transcription factor 70* (*WRKY70*) | TGGTAAAGCATAGTGACTCAAC | AGAGGGAGAAGAAGGCATAA |
| *Pathogenesis-related protein 1* (*PR1*)  *1-aminocyclopropane-1-carboxylate synthase 2* (*ACS2*) | GGTAACTGGAGAGGACAA  GATGGATTTGCGTCCACTTT | GACAATCGATCACTTTATTC  GATCCAGGCGAGACGTTAG |
| *UDP-glycosyltransferase* (*UDP-G*) | GATGAACGCCACCTTCTTAG | CTCCTTCCATAACAATCCTCAC |
| *Ethylene Response Factor 1* (*ERF1*) | AGACTTGGGAGTTGAATTA | TACATTGCGATCTTGATTA |
| *Allene oxide synthase* (*AOS*) | CCTCTTCCTTCTCTTCACCAAA | GCCGGGTATAGTCCTGGTAGA |


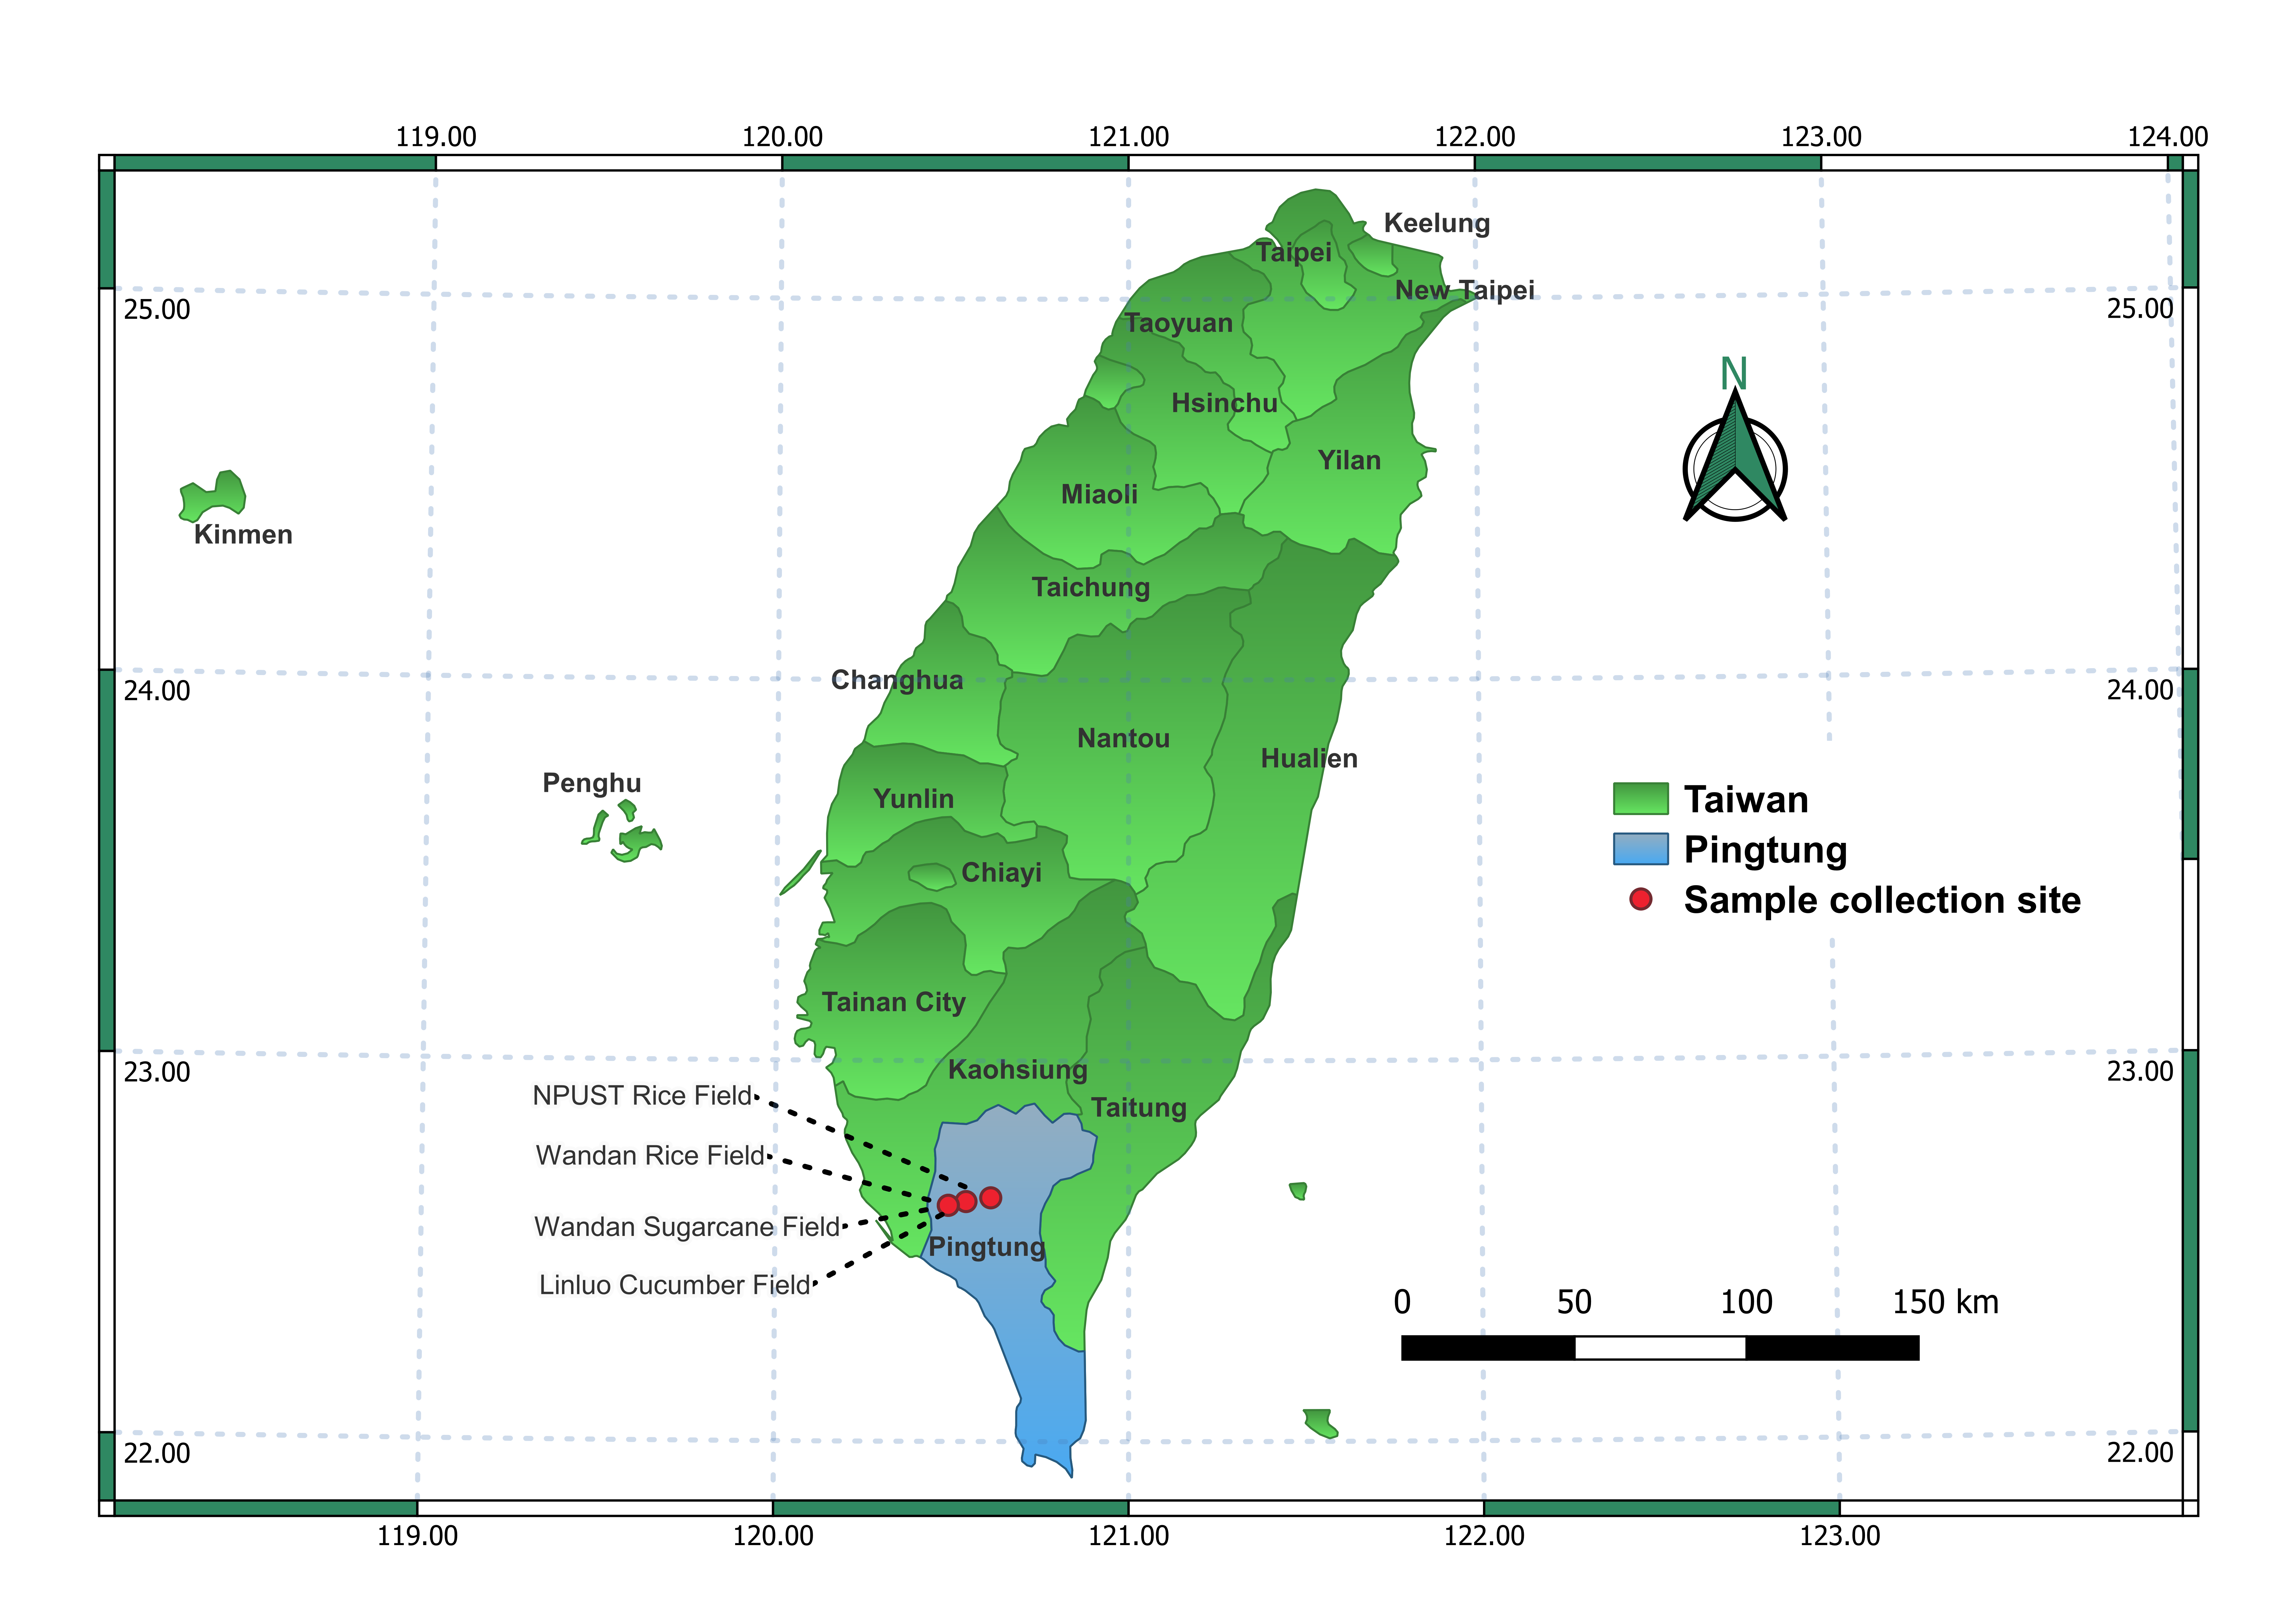


**Fig. S1.** Map of Taiwan showing the four sampling sites in Pingtung County. Two of the fields were being used for rice cultivation and had been recently harvested, namely, Wandan rice field (GPS coordinate: 22°36'56.3"N 120°29'19.1"E) and NPUST rice field (GPS coordinate: 22°38'38.0"N 120°36'18.2"E). The other two fields were still under cultivation, namely, Linluo cucumber field (GPS coordinate: 22°37'56.2"N 120°32'09.6"E) and Wandan sugarcane field (GPS coordinate: 22°36'57.2"N 120°29'17.2"E).


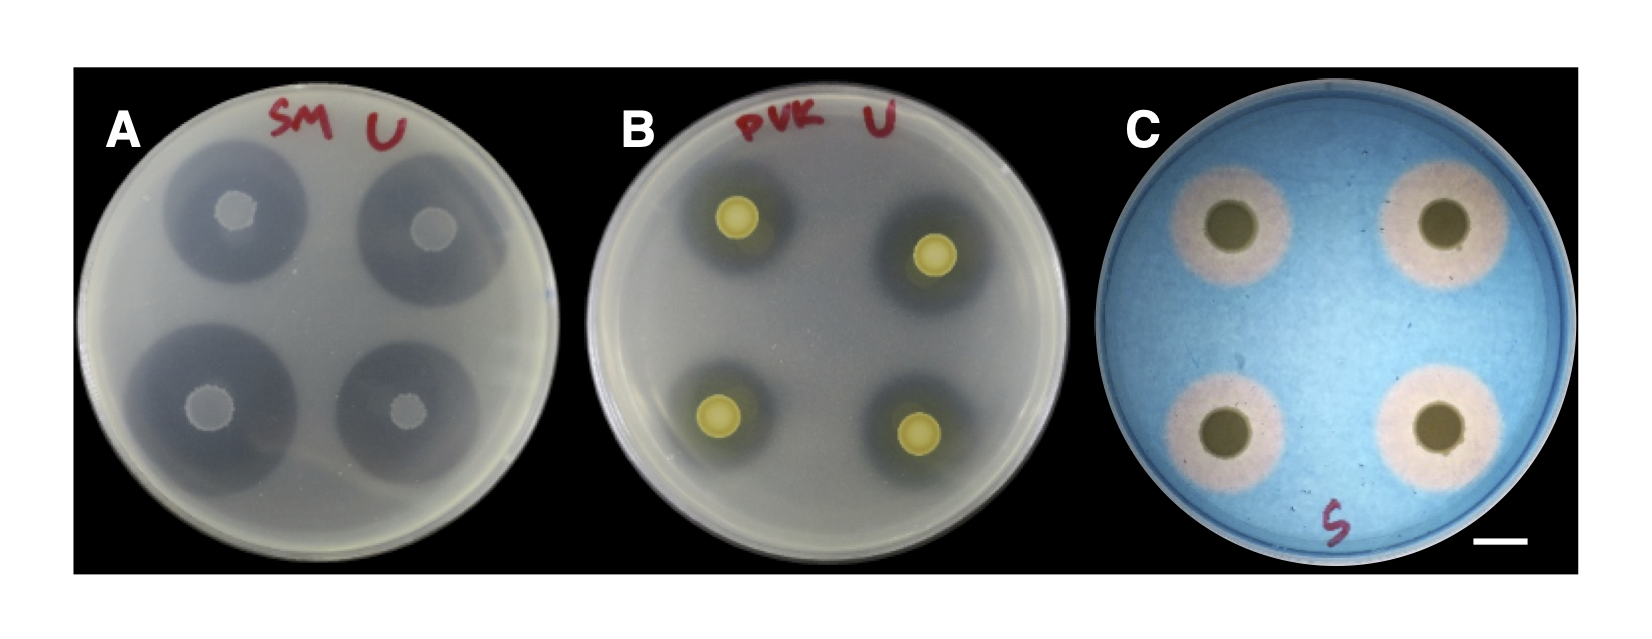


**Fig. S2.** *In vitro* beneficial traits exhibited by representative rhizobacterial strains. The appearance of a halo-zone around the bacterial colony indicates (A) silicate solubilization on silicate medium, (B) phosphate solubilization on Pikovskaya medium, and (C) siderophore production on Chrome Azurol Sulphonate (CAS) agar medium. A scale bar at the bottom right corner represents 1 cm.
